# Supplementary material
Source: publisher site journal article supplement (https://www.spandidos-publications.com/1288/downloadSupplementary)
Supplement: Supplementary file 1 [file downloadSupplementary]

## Sheet: Supplementary Table S3
	Table SV. Identified genes by gene microarray.
	No.	ID	RefSeq_id	Symbol	Description
	1	opHsV0400009032	XM_011517043.1	AARD	Alanine and arginine rich domain containing protein
	2	H200001823	NM_016608.1	ARMCX1	Armadillo repeat containing, X-linked 1
	3	opHsV0400002995	NM_001114735.1	BCL2A1	BCL2 related protein A1
	4	AHsV10000055	NM_004334.2	BST1	Bone marrow stromal cell antigen 1
	5	H200005203	XM_011520280.1	BDNF	Brain-derived neurotrophic factor
	6	H200014027	NM_001293675.1	CA2	Carbonic anhydrase II
	7	H200020432	NM_138809.3	CMBL	Carboxymethylenebutenolidase homolog (Pseudomonas)
	8	AHsV10001818	NR_108072.1	CPT1C	Carnitine palmitoyltransferase 1C
	9	H300001380	NM_001199739.1	CTSS	Cathepsin S
	10	H200002725	NM_001301042.1	C1orf54	Chromosome 1 open reading frame 54
	11	H300018650	XM_011536539.1	COCH	Cochlin
	12	AHsV10001770	NM_138455.3	CTHRC1	Collagen triple helix repeat containing 1
	13	AHsV10000953	NM_001846.2	COL4A2	Collagen type IV alpha 2
	14	H200006995	NM_000393.3	COL5A2	Collagen type V alpha 2
	15	H200006683	XM_011535297.1	CCNA1	Cyclin A1
	16	AHsV10000560	NM_001004023.1	DYRK3	Cual specificity tyrosine phosphorylation regulated kinase 3
	17	H200016697	NM_032048.2	EMILIN2	Elastin microfibril interfacer 2
	18	CHsGV10002681	NM_001301012.1	EYA4	EYA transcriptional coactivator and phosphatase 4
	19	H200004899	XM_011509141.1	FAM129A	Family with sequence similarity 129 member A
	20	CHsGV10003027	NM_001085480.2	FAM162B	Family with sequence similarity 162 member B
	21	CHsGV10001682	XM_011519378.1	FAM171A1	Family with sequence similarity 171 member A1
	22	CHsGV10002928	XM_011543071.1	FEZ1	Fasciculation and elongation protein zeta 1
	23	H200011092	XM_011520748.1	FAR2	Fatty acyl-CoA reductase 2
	24	H200008768	NM_002006.4	FGF2	Fibroblast growth factor 2
	25	CHsGV10002361	NM_001291812.1	FGF5	Fibroblast growth factor 5
	26	H200005947	NM_000165.4	GJA1	Gap junction protein alpha 1
	27	H200006611	NM_012413.3	QPCT	Glutaminyl-peptide cyclotransferase
	28	H200004646	NM_015696.4	GPX7	Glutathione peroxidase 7
	29	AHsV10001274	XM_011514535.1	GSTA4	Glutathione S-transferase alpha 4
	30	H200009369	NM_025130.3	HKDC1	Hexokinase domain containing 1
	31	H200004340	NM_020386.4	HRASLS	HRAS like suppressor
	32	H300002867	NM_000201.2	ICAM1	Intercellular adhesion molecule 1
	33	H200003579	NM_000640.2	IL13RA2	Interleukin 13 receptor subunit alpha 2
	34	H300008877	NM_024337.3	IRX1	Iroquois homeobox 1
	35	AHsV10001549	NM_152349.2	KRT222	Keratin 222, type II
	36	CHsGV10001693	XM_005257200.3	KRT23	Keratin 23, type I
	37	AHsV10002531	NM_001112720.2	LIMCH1	LIM and calponin homology domains 1
	38	opHsV0400005778	NR_027072.2	LINC00189	Long intergenic non-protein coding RNA 189
	39	CHsGV10000024	NM_007289.2	MME	Membrane metallo-endopeptidase
	40	H200007042	NM_017459.2	MFAP2	Microfibrillar associated protein 2
	41	CHsGV10002354	NM_001203262.1	NDUFC2-KCTD14	NDUFC2-KCTD14 readthrough
	42	CHsGV10001189	XM_006716719.1	PLIN2	Perilipin 2
	43	H200008321	NM_024829.5	PLBD1	Phospholipase B domain containing 1
	44	CHsGV10000217	NM_002237.3	KCNG1	Potassium voltage-gated channel modifier subfamily G member 1
	45	H200011167	XM_005253358.3	KCNJ8	Potassium voltage-gated channel subfamily J member 8
	46	AHsV10001869	NM_006905.2	PSG1	Pregnancy specific beta-1-glycoprotein 1
	47	H300013865	NM_001130014.1	PSG5	Pregnancy specific beta-1-glycoprotein 5
	48	H300020751	NM_001130168.1	PSG8	Pregnancy specific beta-1-glycoprotein 8
	49	H200005772	NR_073012.1	PRSS21	Protease, serine 21
	50	H300000716	NM_000313.3	PROS1	Protein S (alpha)
	51	AHsV10002175	NM_000313.3	PROS1	Protein S (alpha)
	52	H200009537	NM_052960.2	RBP7	Retinol binding protein 7
	53	AHsV10001408	NM_052960.2	RBP7	Retinol binding protein 7
	54	H200008154	NM_002615.5	SERPINF1	Serpin peptidase inhibitor, clade F (alpha-2 antiplasmin, pigment epithelium derived factor), member 1
	55	CHsGV10002042	NM_006931.2	SLC2A3	Solute carrier family 2 member 3
	56	H200006732	XM_011537065.1	SALL2	Spalt-like transcription factor 2
	57	H300009069	NM_032417.3	SPANXD	SPANX family member D
	58	CHsGV10000605	NM_003206.3	TCF21	Transcription factor 21
	59	CHsGV10003348	NM_152680.2	TMEM154	transmembrane protein 154
	60	H200000789	NM_015544.2	TMEM98	Transmembrane protein 98
	61	opHsV0400006551	NM_130776.1	XAGE3	X antigen family member 3
